# Supplementary figures and images for: Plasticity and intratumoural heterogeneity of cell surface antigen expression in breast cancer
Source: PubMed Central journal article supplement — Br J Cancer. 2018 Feb 20;118(6):813–9. doi: 10.1038/bjc.2017.497 (PMC5886127; doi:10.1038/bjc.2017.497), 2018-02-20

# Supplementary Figure 2

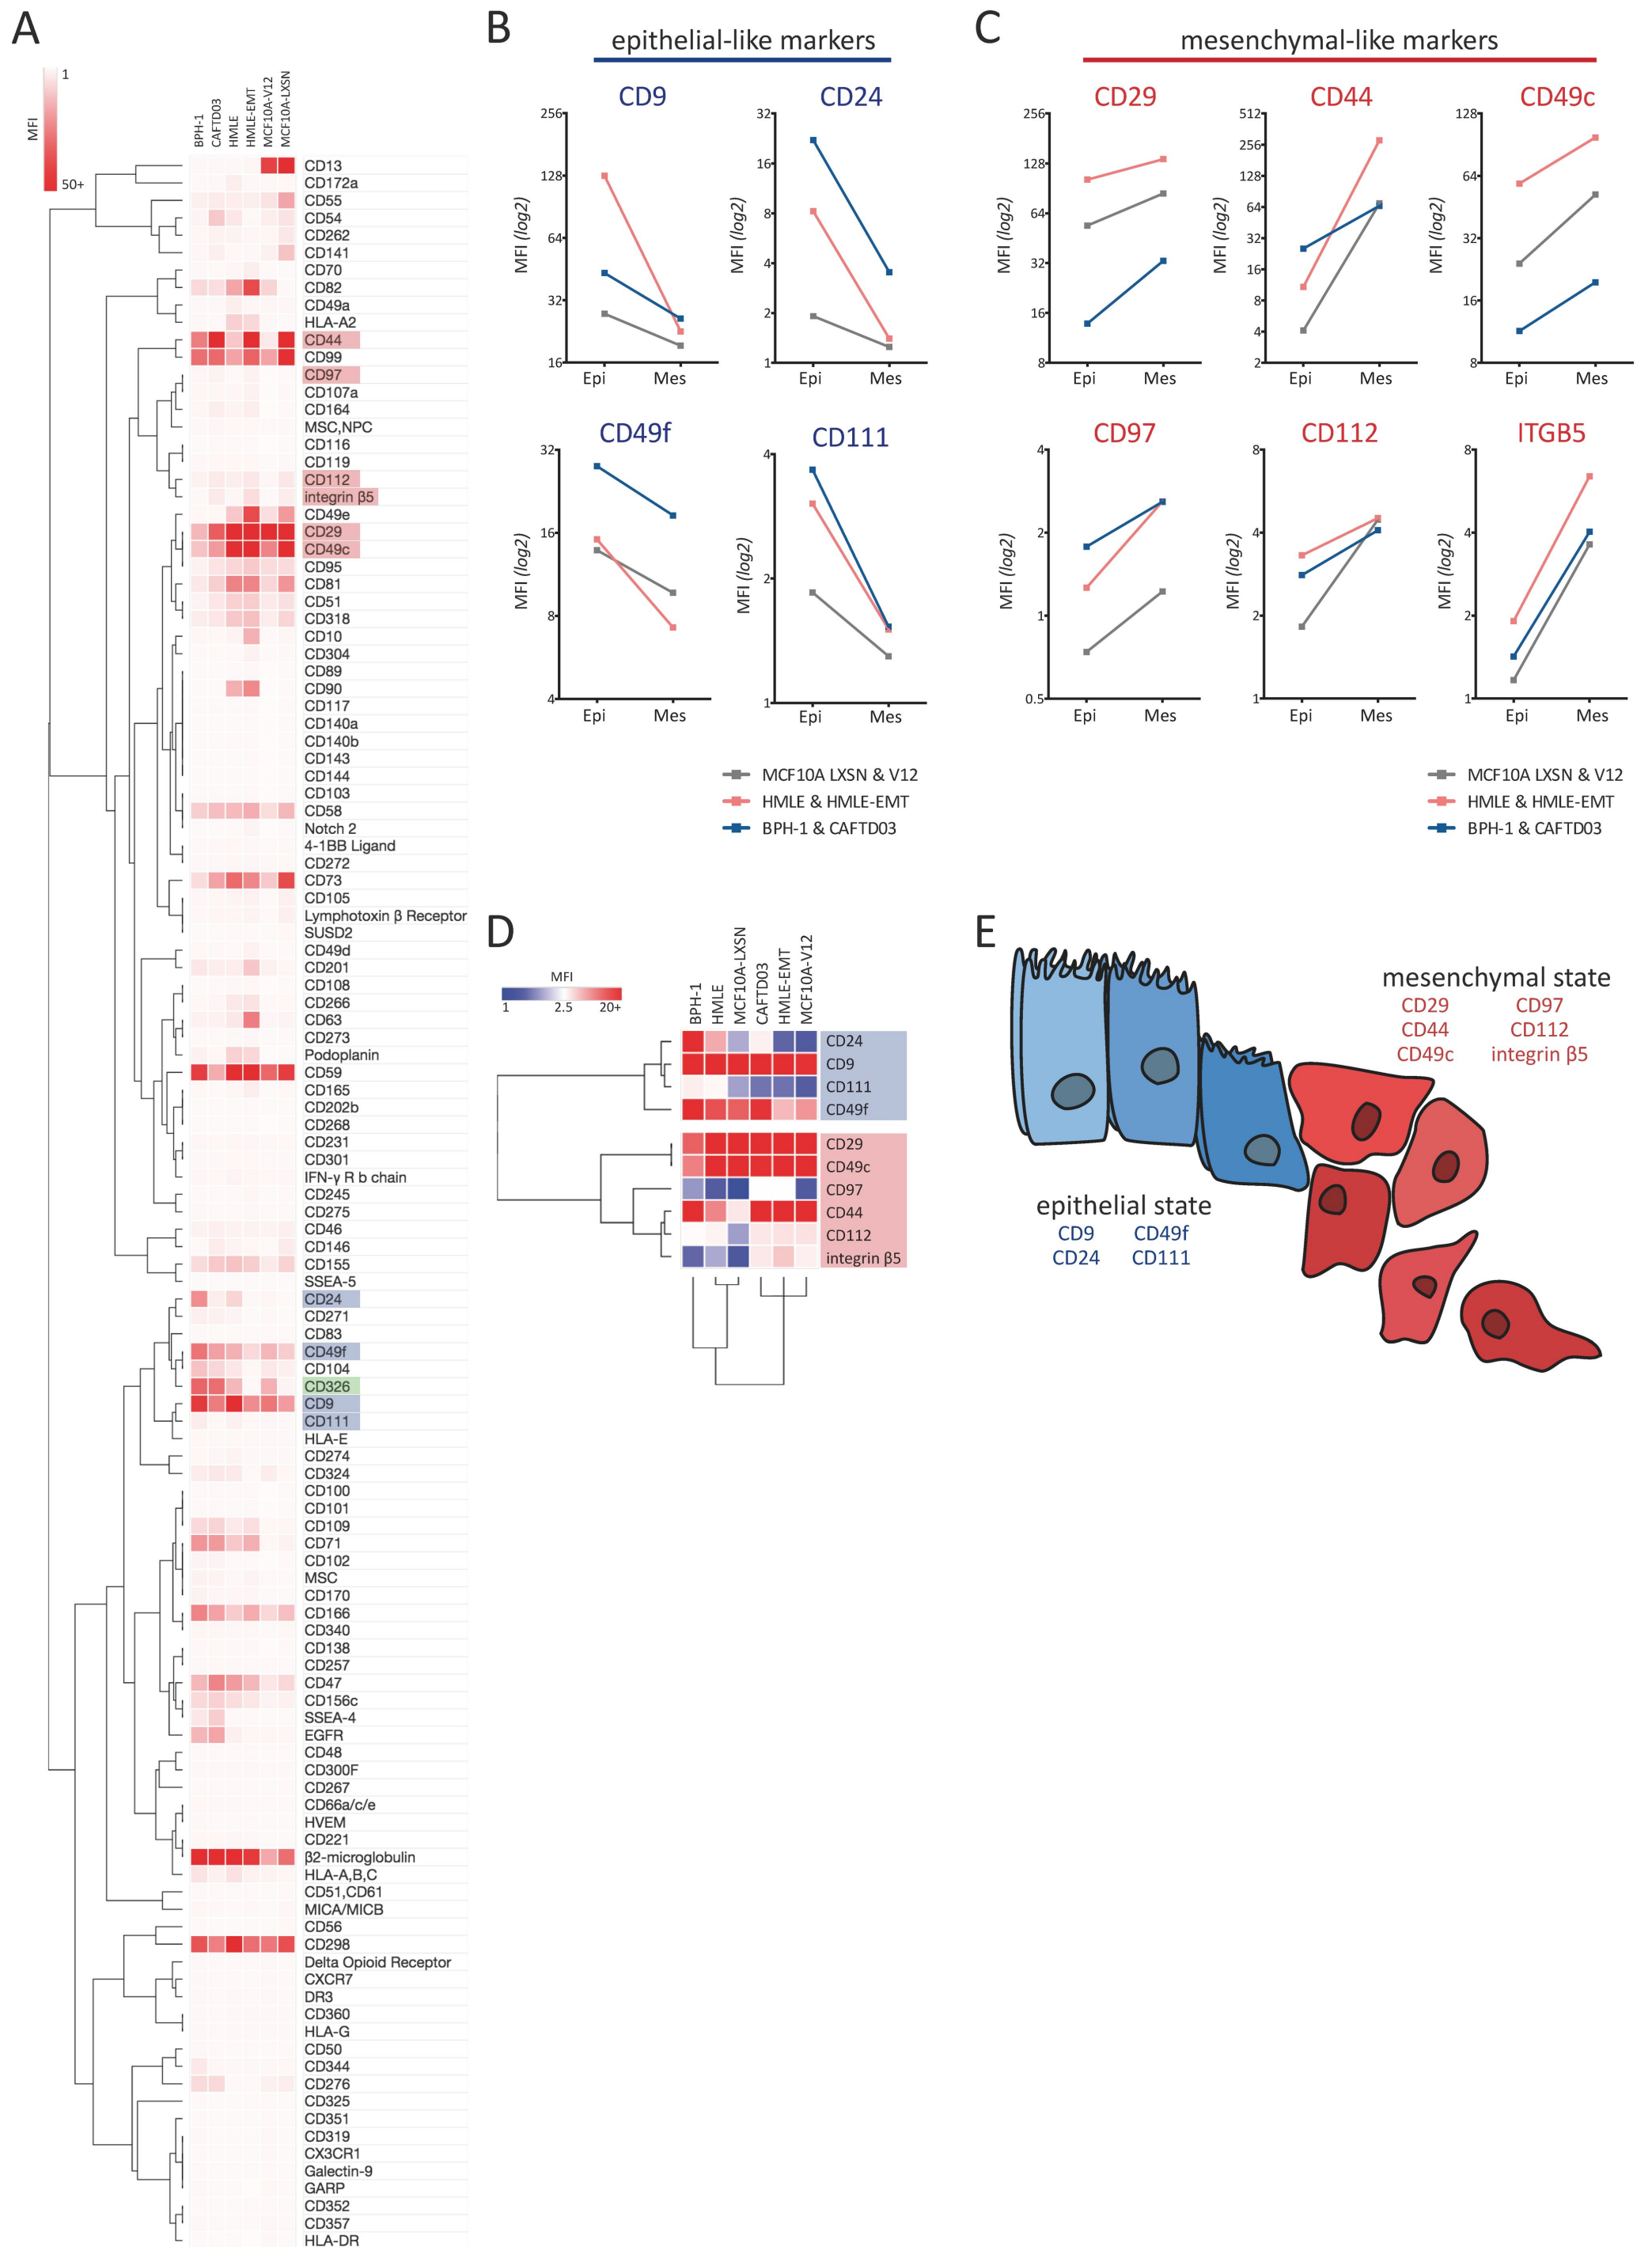

Supplement: bjc2017497x3.pdf [file bjc2017497x3.pdf]

# Supplementary Figure 4

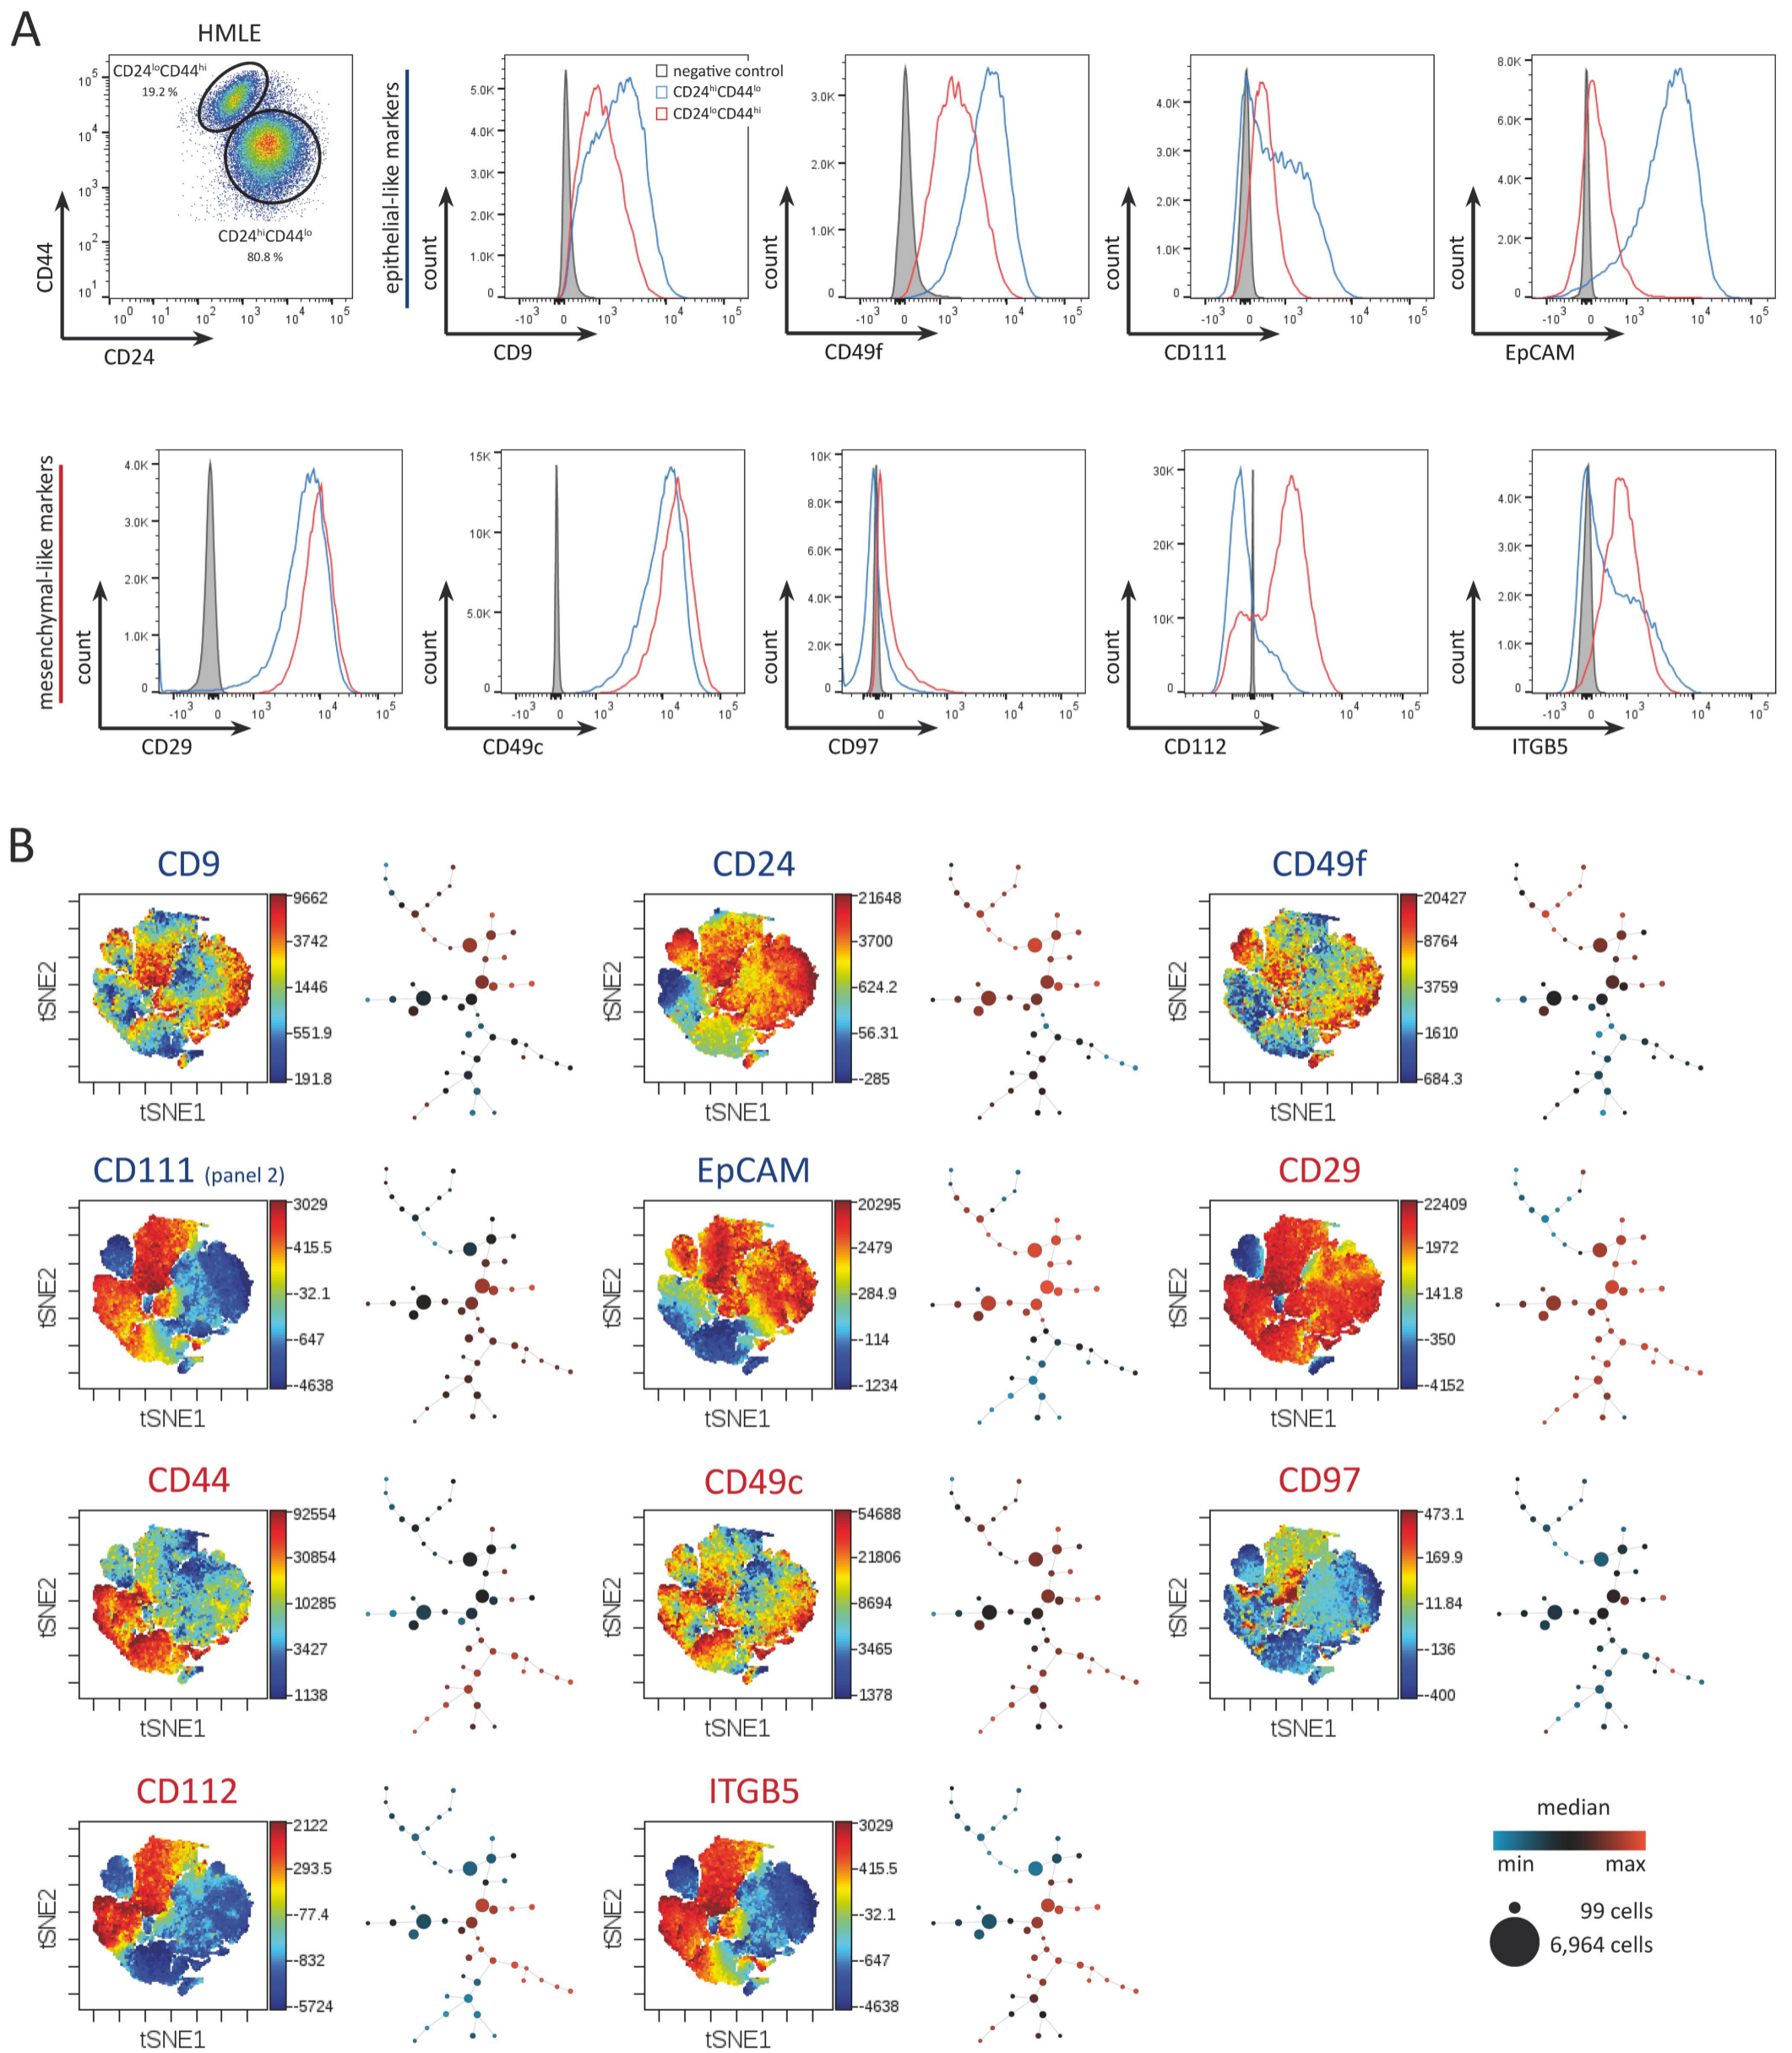

Supplement: bjc2017497x5.pdf [file bjc2017497x5.pdf]

# Supplementary Figure 5

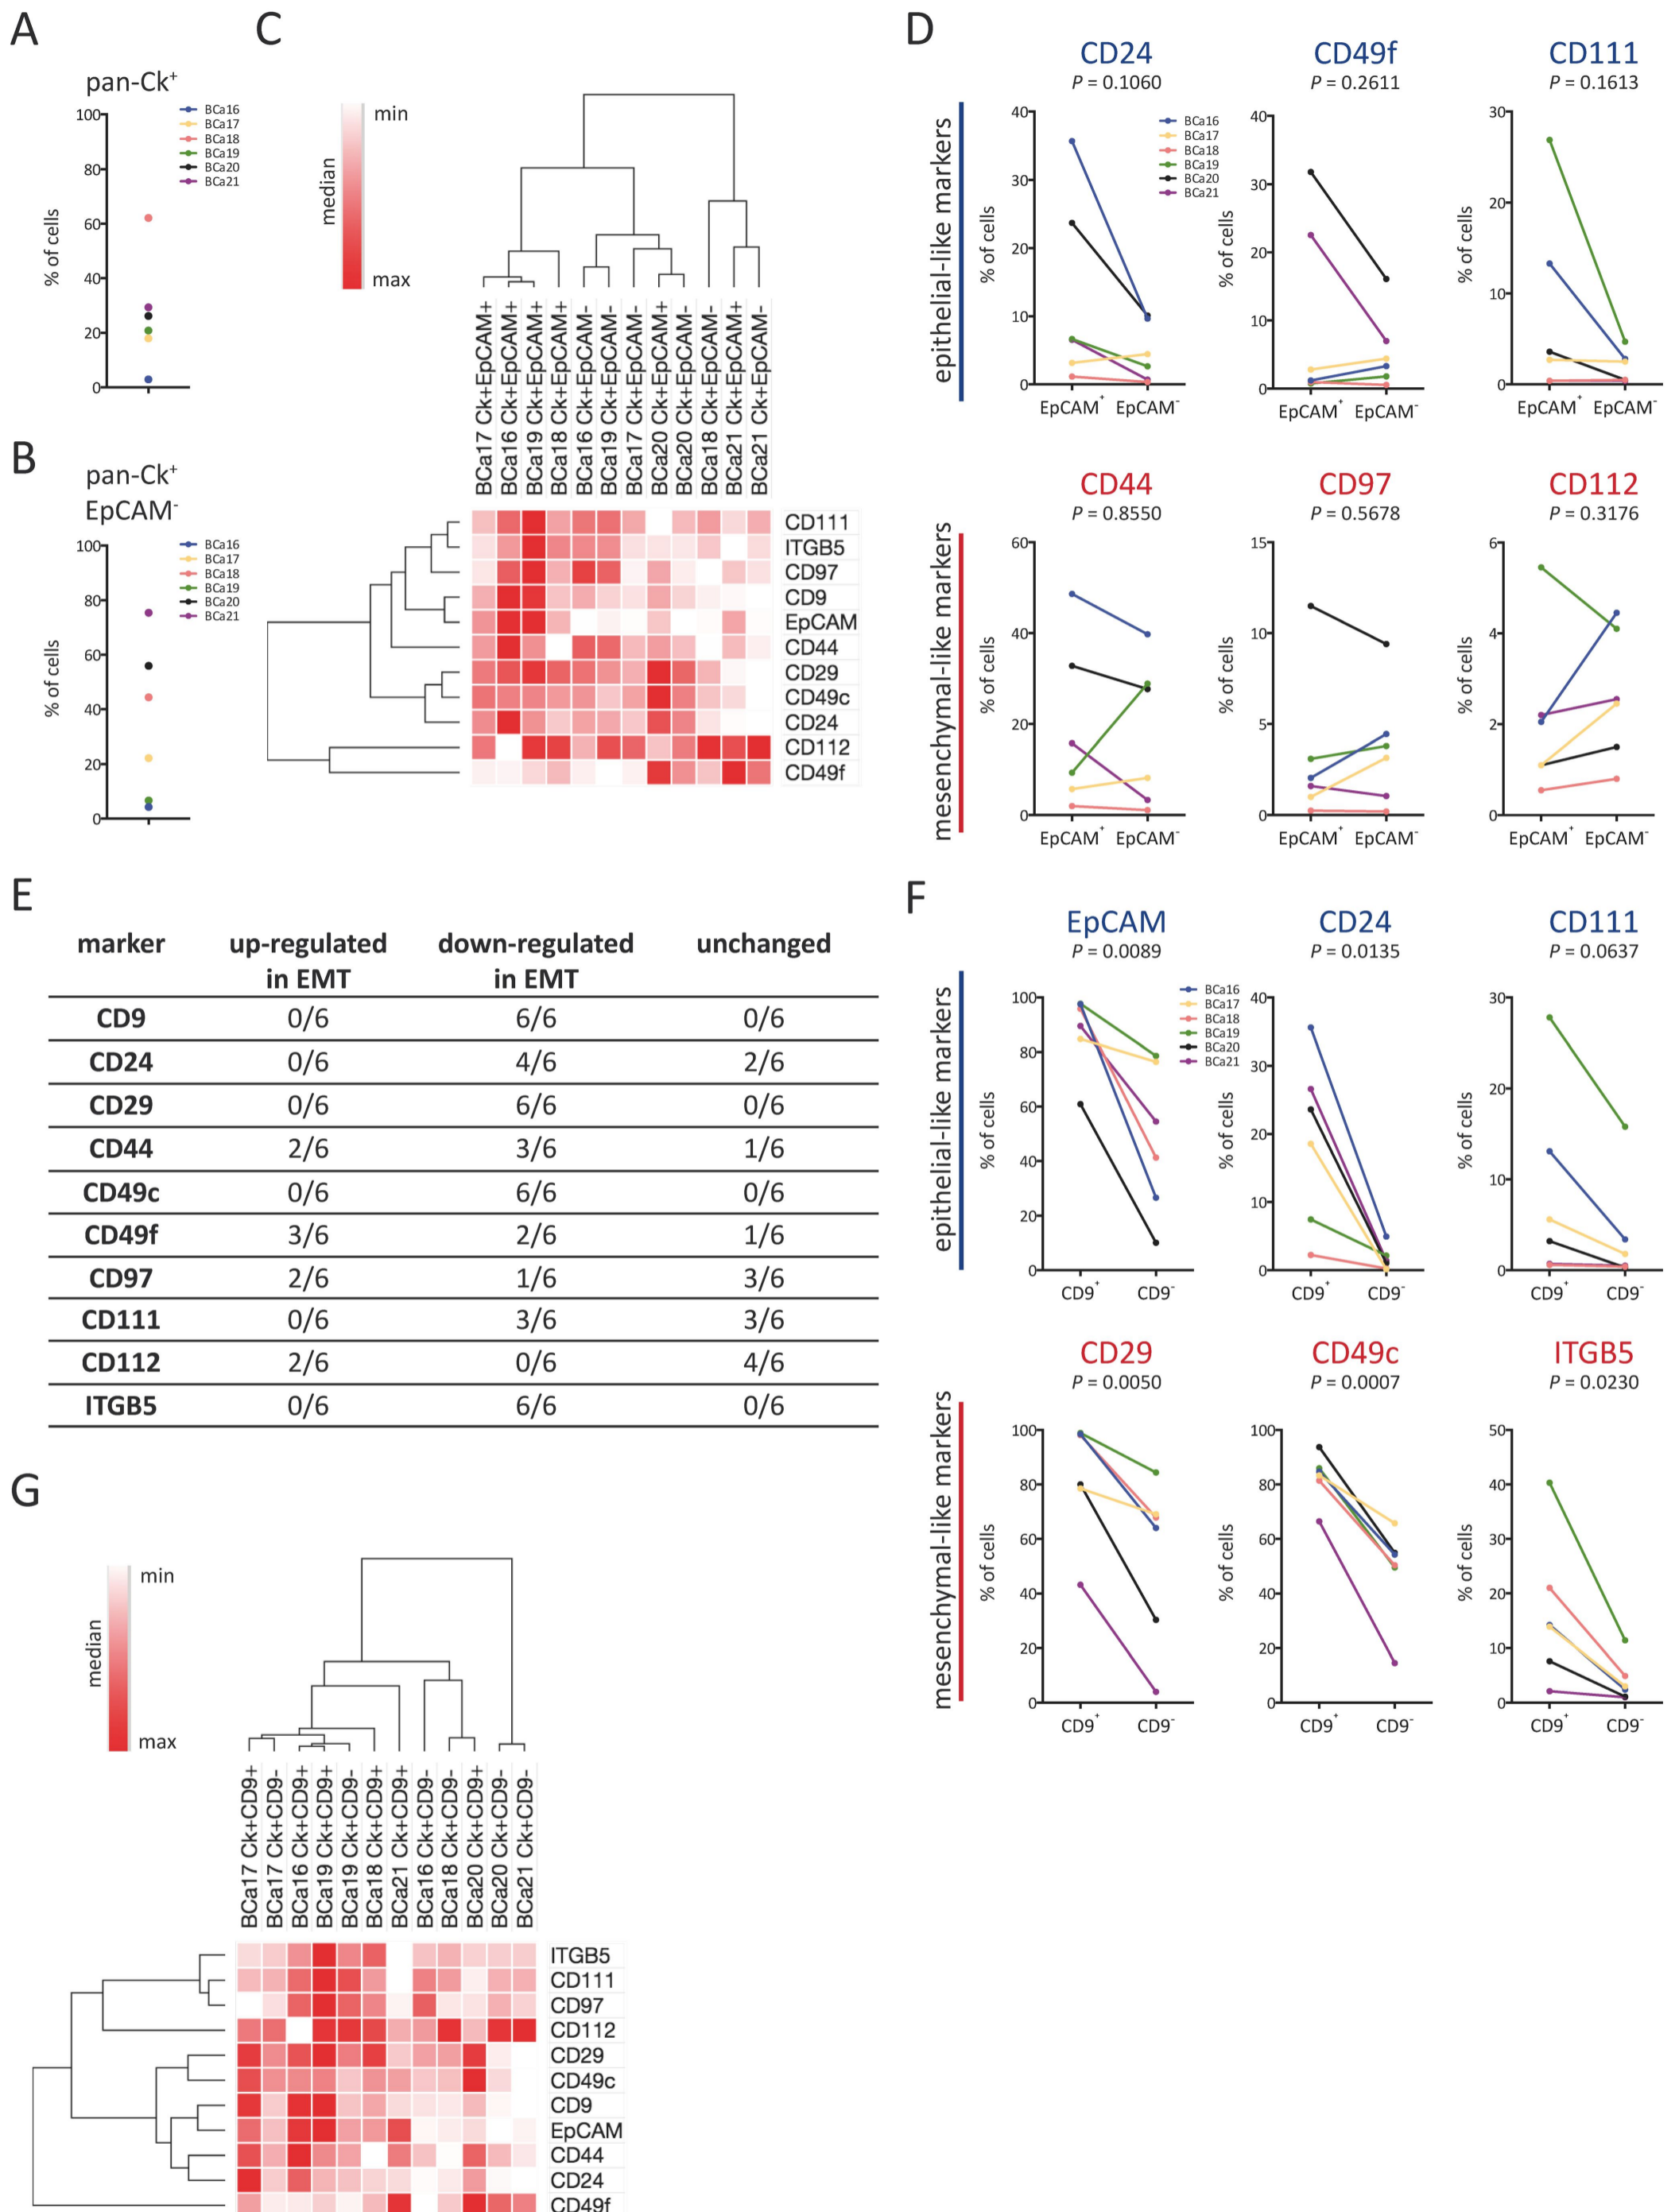

Supplement: bjc2017497x6.pdf [file bjc2017497x6.pdf]

# Supplementary Figure 6

**A**

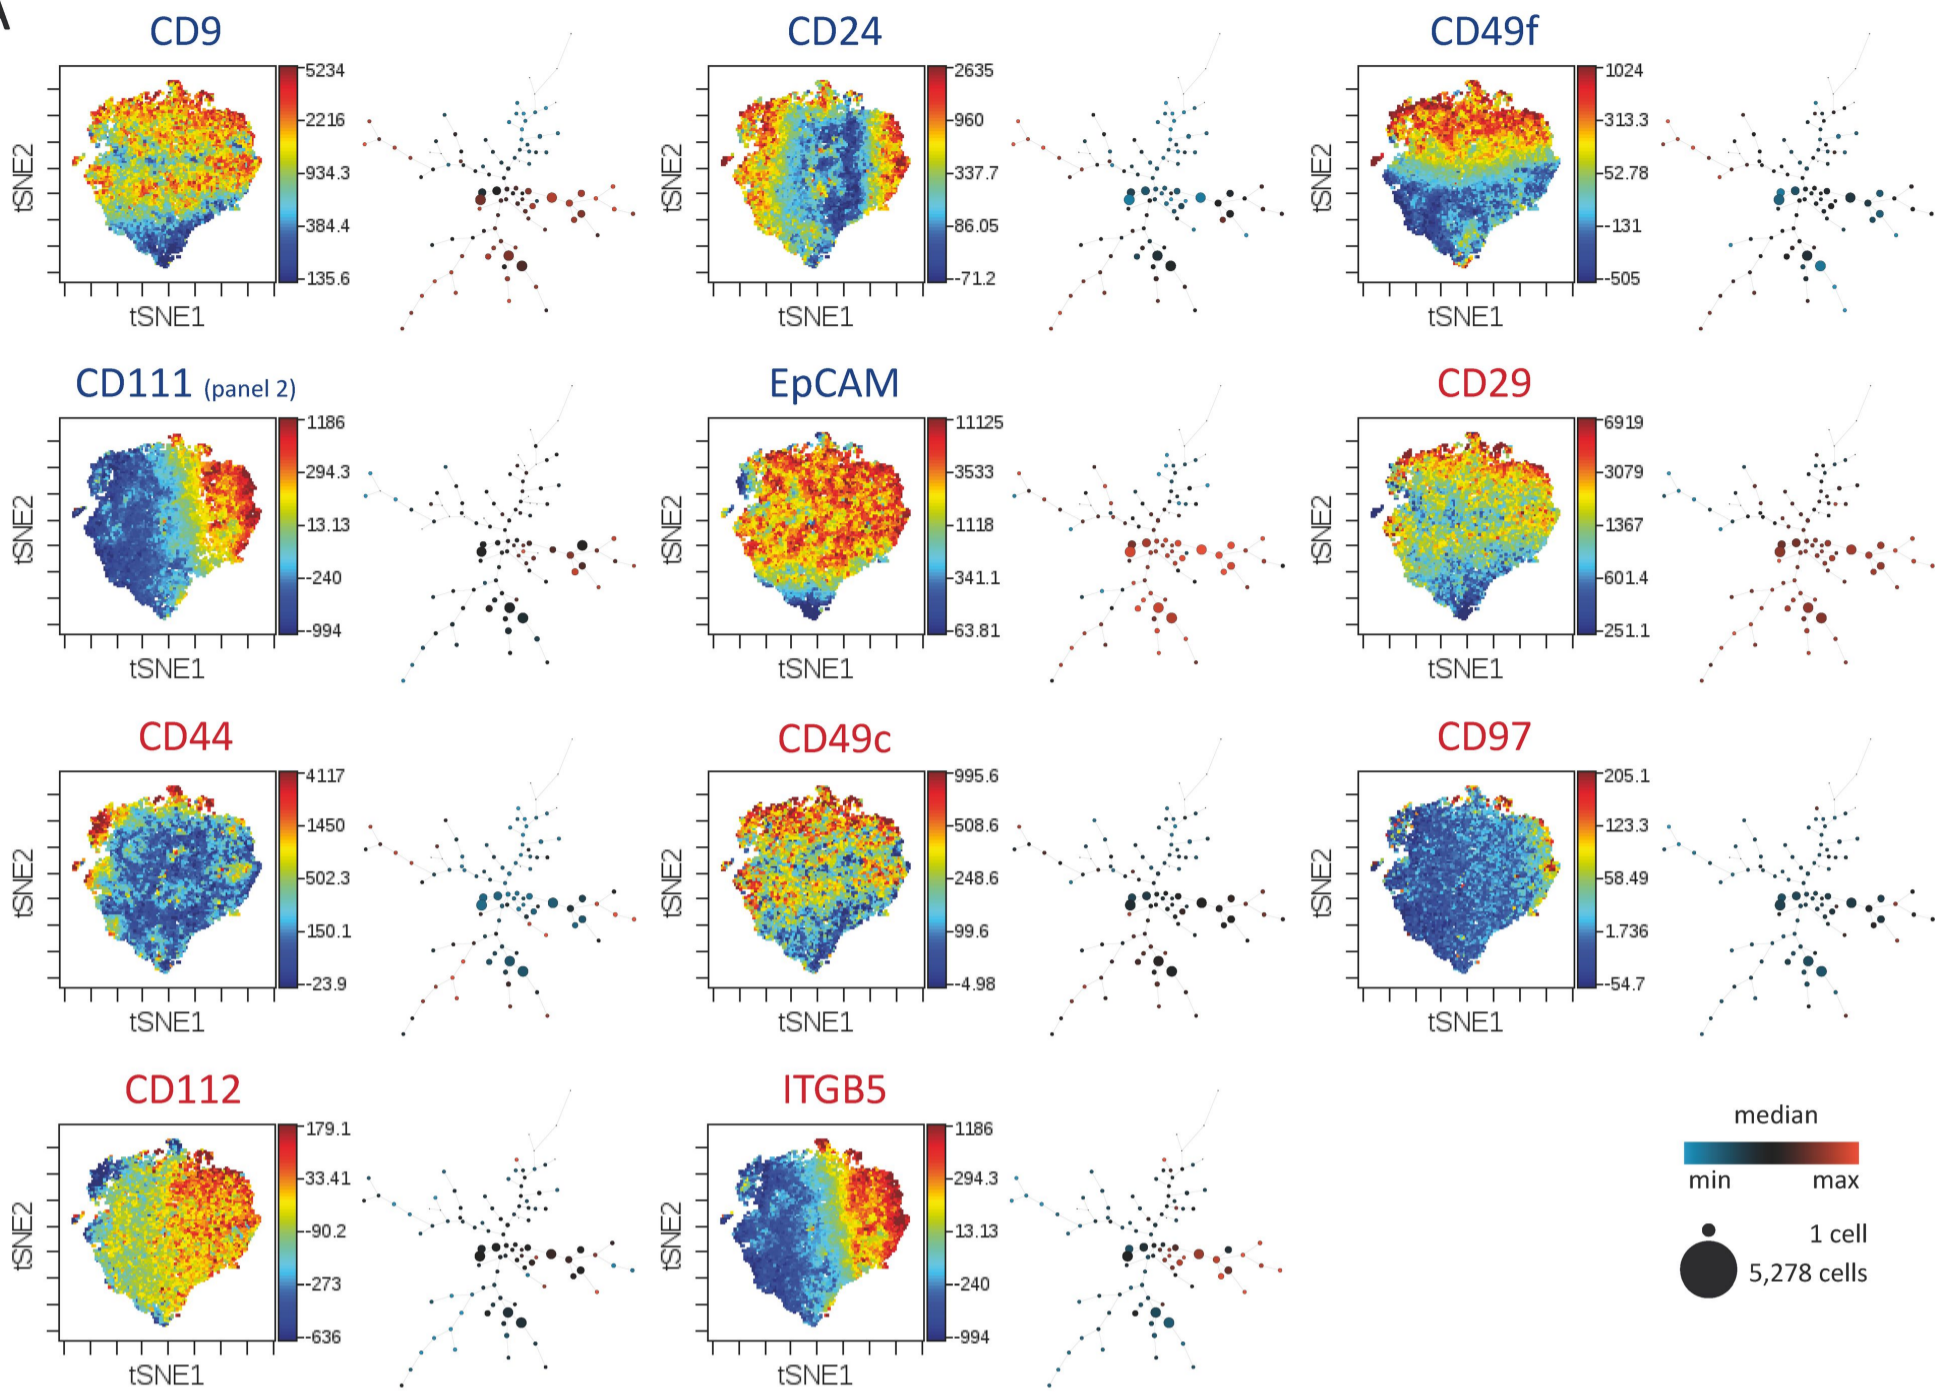

**B**

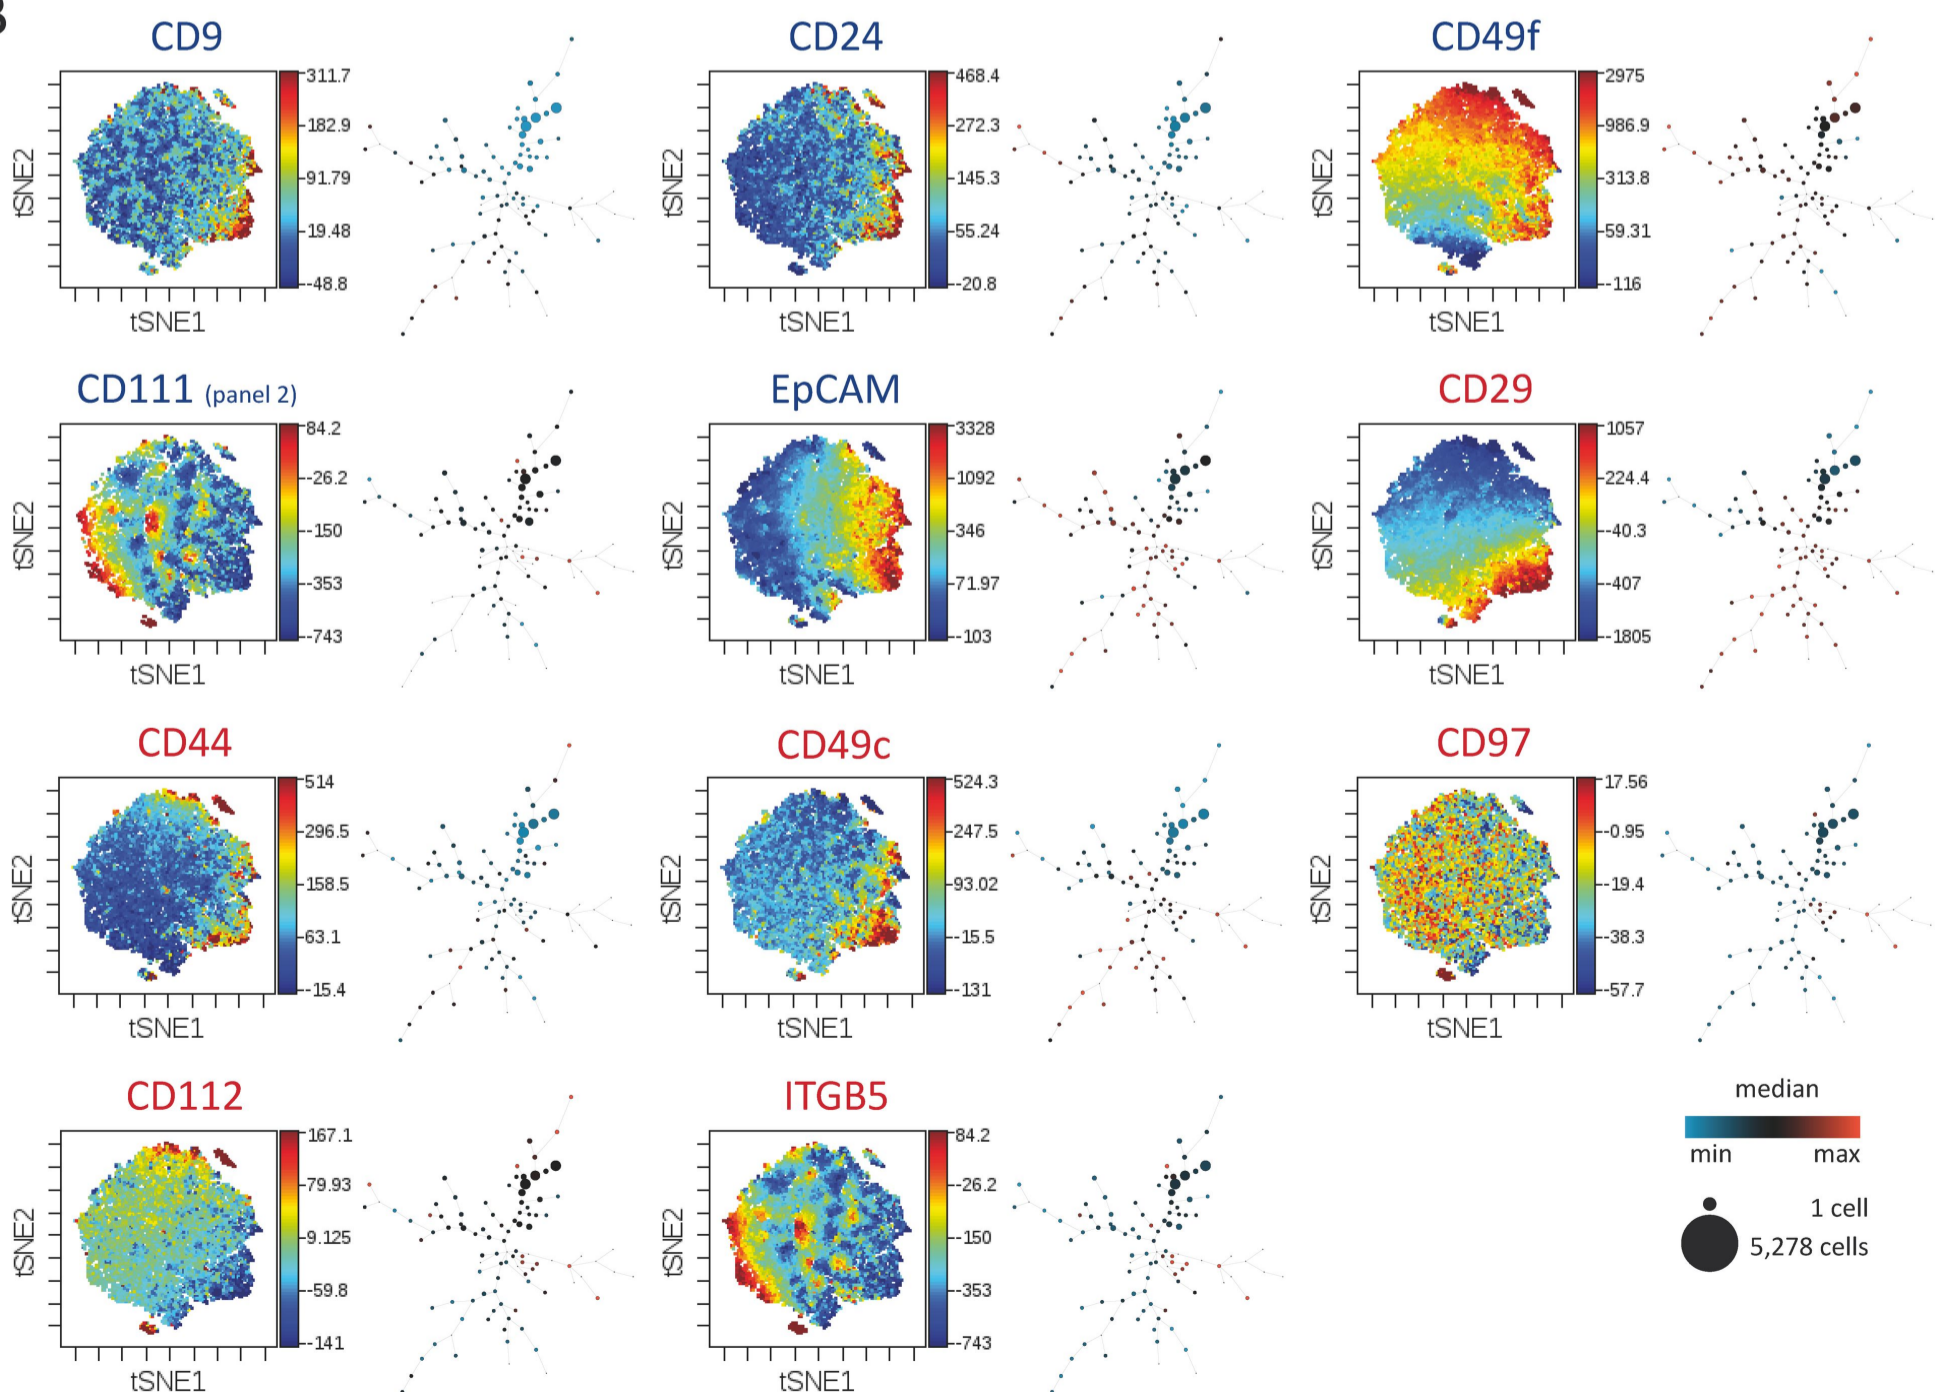

Supplement: bjc2017497x7.pdf [file bjc2017497x7.pdf]

# Supplementary Figure 7

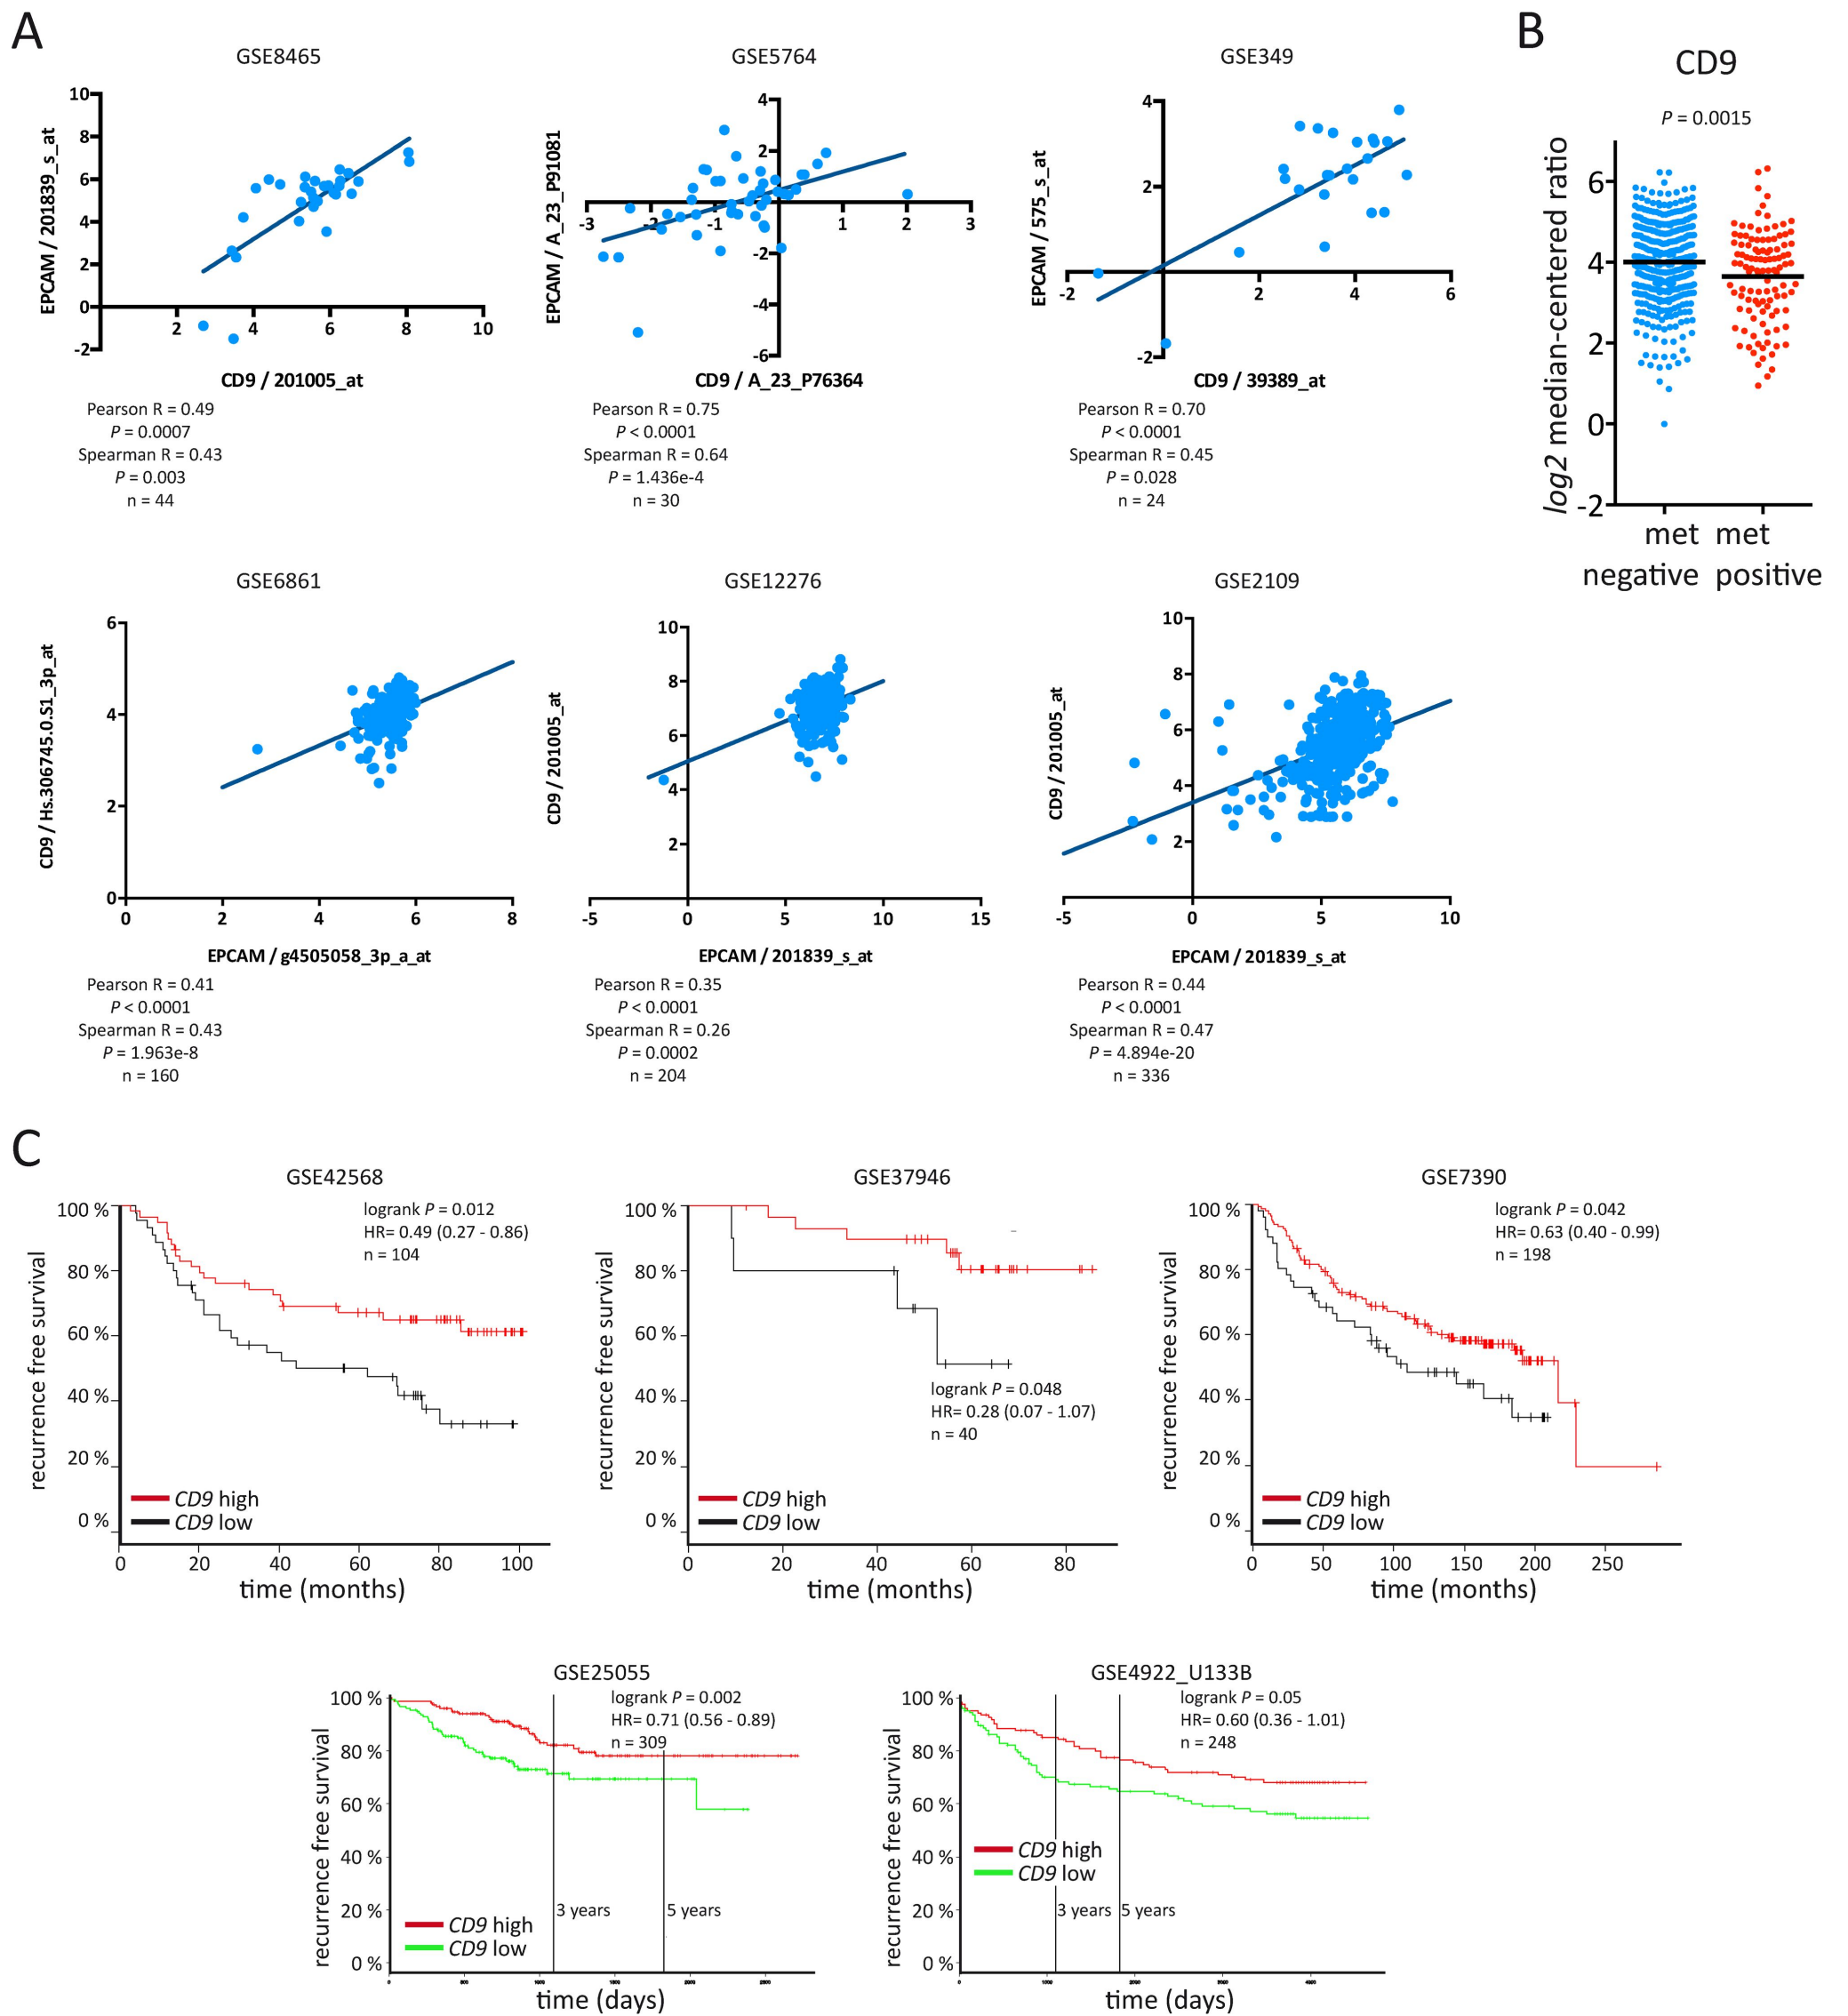

Supplement: bjc2017497x8.pdf [file bjc2017497x8.pdf]
